# Supplementary material for: An miR164-resistant mutation in the transcription factor gene CpCUC2B enhances carpel arrest and ectopic boundary specification in Cucurbita pepo flower development
Source: PubMed Central journal article supplement (PMC10967242; doi:10.1093/jxb/erad486), 2023-12-08
Supplement: erad486_suppl_supplementary_tables_s1-s2_figures_s1-s8.pdf [file erad486_suppl_supplementary_tables_s1-s2_figures_s1-s8.pdf]

**Supplementary Table S1.** List of the CUC genes and proteins used in alignments and phylogenetic analysis.

| <b>Species</b>                     | <b>GeneID</b> | <b>Gene name</b> |
|------------------------------------|---------------|------------------|
|                                    | 111810386     | <i>CpCUC1A</i>   |
|                                    | 111803201     | <i>CpCUC1B</i>   |
|                                    | 111789288     | <i>CpCUC2A</i>   |
| <b><i>Cucurbita pepo</i></b>       | 111797633     | <i>CpCUC2B</i>   |
|                                    | 111805279     | <i>CpCUC3A</i>   |
|                                    | 111789055     | <i>CpCUC3B1</i>  |
|                                    | 111799080     | <i>CpCUC3B2</i>  |
| <b><i>Cucurbita maxima</i></b>     | 111476901     | <i>CmaxCUC2</i>  |
| <b><i>Cucurbita moschata</i></b>   | 111442545     | <i>CmosCUC2</i>  |
| <b><i>Cucumis sativus</i></b>      | 101205357     | <i>CsCUC2</i>    |
| <b><i>Cucumis melo</i></b>         | 103501784     | <i>CmCUC2</i>    |
|                                    | 820748        | <i>AtCUC1</i>    |
| <b><i>Arabidopsis thaliana</i></b> | 835478        | <i>AtCUC2</i>    |
|                                    | 843975        | <i>AtCUC3</i>    |
| <b><i>Solanum lycopersicum</i></b> | 100301934     | <i>SIGOB</i>     |
| <b><i>Capsicum annuum</i></b>      | 107877396     | <i>CaCUC2</i>    |
| <b><i>Prunus persica</i></b>       | 18779165      | <i>PpCUC2</i>    |
| <b><i>Vitis vinifera</i></b>       | 100246914     | <i>VvCUC2</i>    |
| <b><i>Medicago truncatula</i></b>  | 25487304      | <i>MtCUC2</i>    |
| <b><i>Carica papaya</i></b>        | 110808876     | <i>CpaCUC2</i>   |
| <b><i>Malus domestica</i></b>      | 103419033     | <i>MdCUC2</i>    |

**Supplementary Table S2:** Primers used for gene expression and mRNA degradation analysis by qPCR.

| <b>Gene</b>                            | <b>Primer</b> | <b>Sequence</b>          |
|----------------------------------------|---------------|--------------------------|
| <b><i>CpACO1A</i></b>                  | F             | CATAGAGTGATGACTCAGACAAGC |
|                                        | R             | CCATTGGACCCAAATTAGCA     |
| <b><i>CpACS11A</i></b>                 | F             | CGTCGTCTTAAGGCCTTTG      |
|                                        | R             | GGTGTACCTAATTTAACGCAAC   |
| <b><i>CpACO2B</i></b>                  | F             | GGAGGGAGAGGAAGATAAGG     |
|                                        | R             | TGGGTTATTGGAAAATGGAG     |
| <b><i>CpWIP1B</i></b>                  | F             | TCCCTACTCCATGCTTCAC      |
|                                        | R             | TCCTCCTCATTCAACAAC       |
| <b><i>CpACS27A</i></b>                 | F             | CCAATACGGACGGTGAA        |
|                                        | R             | GGAGAAGCTGAAGAAGGAAG     |
| <b><i>CpCUC1A_mir164</i></b>           | F             | GGATCCCGAACCGAGTTCCT     |
|                                        | R             | GACCGAGGGGGAGAGATCAG     |
| <b><i>CpCUC1B_mir164</i></b>           | F             | GCCGACACCAGTATCAGCAC     |
|                                        | R             | AGACGGACAGATTAGGACCGC    |
| <b><i>CpCUC2A_mir164</i></b>           | F             | GCCACTTCTCGACTCGTCACTT   |
|                                        | R             | GTTTCGGTGGAAAGCGGGTAG    |
| <b><i>CpCUC2B_mir164</i></b>           | F             | GCCGCTGCTAGATTCGTCTT     |
|                                        | R             | GAGGGGGAGTGGCAAATCG      |
| <b><i>CpCUC2B_3'</i></b>               | F             | TACGATTTTGCCACTCCCCC     |
|                                        | R             | AGGACATGTTGCCATGGTGG     |
| <b><i>CpEF1<math>\alpha</math></i></b> | F             | CGTCAAGAAGAAATAAGCCA     |
|                                        | R             | CTACTACGAGAGAGAGAGCCG    |
| <b><i>CpACT</i></b>                    | F             | CCTCTCAATCCCAAAGCTA      |
|                                        | R             | CGGCCTGGATAGCAACATA      |

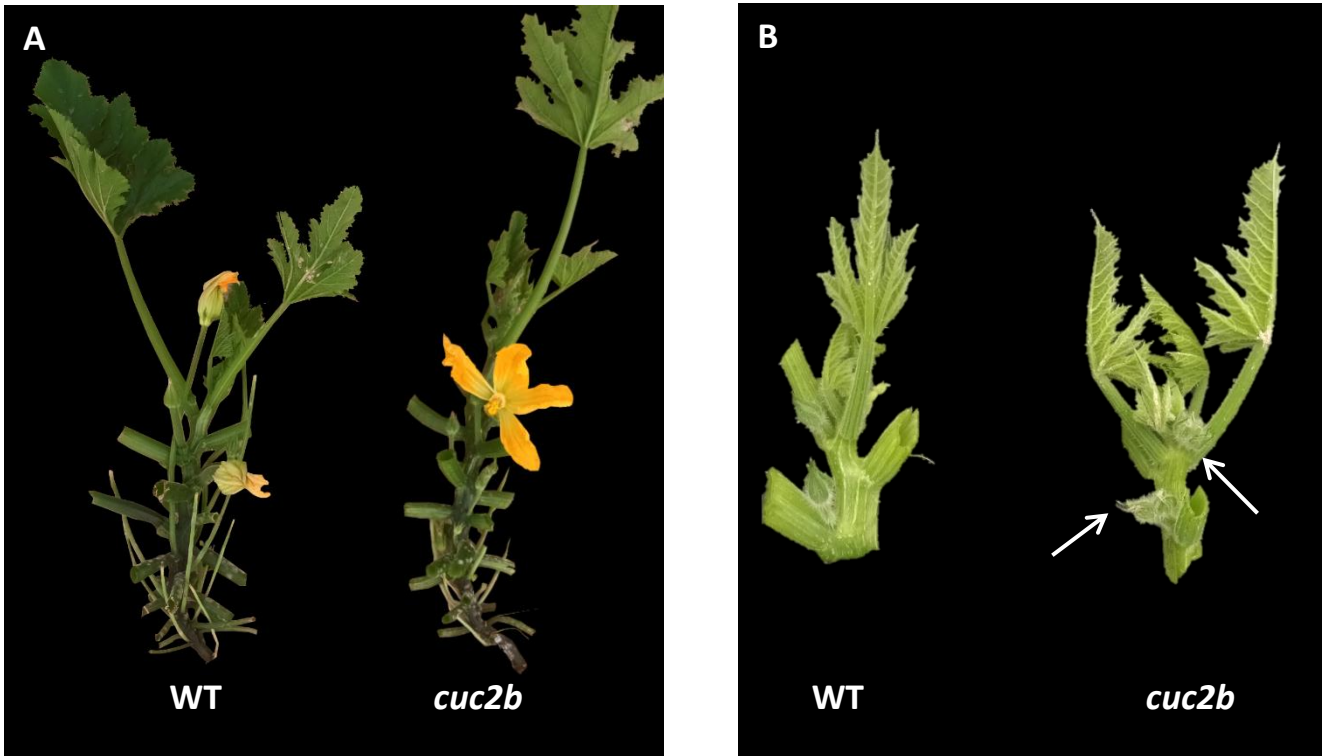

**Supplementary Figure S1.** Effects of the *cuc2b* mutation on vegetative development. **(A)** WT and *cuc2b* complete plant with removed old leaves and flowers, showing the main stem. The absence of lateral branches and unaltered apical dominance is observed. **(B)** Detail of the apical shoot of WT and *cuc2b* plants. White arrows indicate double flowers.



*CpCUC2B* LYSAPVAATAVSGN-ITDRDSCSYNS-----P--REHVSCFST-TAGGSFNIPS 265  
*CpCUC2A* LYSAPATISTASGN-IPDRDRSYNS-----PAAREHVSCFST-TAGGSLNIPN 263  
*CpCUC1B* A-----D-----PSEHELHVTCFSTNNVNY----- 225  
*CpCUC1A* PYLSAAADTSISTSAFANREGSSLDD-----QREHELHVTCFSTNNLSYPAAS-- 249  
*CmaxCUC2* LYSAPVAATAVSGN-ITDRESFSYNS-----P--REHVSCFST-TTGGSFNIPS 265  
*CmosCUC2* LYSAPVAATAVSGN-ITDRDSCSYNS-----P--REHVSCFST-TTGGSFNIPS 266  
*CsCUC2* LYSAPATGTAASGN-ITDRDSCSYNS-----PTAREHVSCFSTTTAGGSFNMPN 268  
*CmCUC2* LYSAPATGTAASGN-ITDRDSCSYNS-----PTAREHVSCFSTTTAGGSFNIPS 267  
*CaCUC2* PYSTTATSSSVVIS--A-----RDH-----SFKKEHVSCFSTTATNSATIDPH 253  
*AtCUC2* TTLGY-----TDSSCSYDSRSTN--TTVTASAIITEHVSCFSTVPTTTTALGLD 274  
*CpaCUC2* TASTT-----AA-ATSLDSCSYDGHFSFSTSAASAAAAASSEHVSCFSTIAAAAAAGSS 260  
*MtCUC2* PYTAASTASFNGGQ-MCNYNS-SNNN-----TDLKEHVSCFSTTTSTTNNVSVH 276  
*PpCUC2* PYQNMN-----TAG-LTDRDSCSYDS-----PIPKEHVSCFSTNP-NSGFNLSS 257  
*VvCUC2* PYAGTSA-----AA-VNDRESCSYDGGESSNN---SNARDQHVVPWFSTIAAAAAAAN 259  
*MdCUC2* PYQPIS-----AAG-----DGCSYDS-----PIPREHVSCFSTNPSNNGFNLPA 252

\*\* \*\*

*CpCUC2B* --Y-----DFAT-PPPLLAVDPSPRFHRNMGLSAFPSLRSLQENLQ-LPFFYSPVN 313  
*CpCUC2A* --Y-----DFAP-LPPLA-AADPSTRFHRNIGLSAFPSLRSLQENLQ-LPFFYSPAN 310  
*CpCUC1B* -----PAGGGSDLSPSVFNNLSFQENLQ-APFFSP-VG 257  
*CpCUC1A* -----F-----PAGGGPNLSVSAFPNLRSIQENLQ-APFFSP-VS 282  
*CmaxCUC2* --Y-----DFAT-PPPLLAVDPSPRFHRNMGLSAFPSLRSLQENLQ-LPFFYSPVN 313  
*CmosCUC2* --Y-----DFAT-PPPLLAVDPSPRFHRNMGLSAFPSLRSLQENLQ-LPFFYSPVN 314  
*CsCUC2* --Y-----DFAT-PSPLL-AADPSPRFHRNIGLSAFPSLRSLQENLQ-LPFFYSPVN 315  
*CmCUC2* --Y-----DFAT-PSPLL-AADPSPRFHRNIGLSAFPSLRSLQENLQ-LPFFYSPVN 314  
*CaCUC2* --S-----VFDI-SNTLH-----ALPFTHYGRNSTFPSLTSLHENLQ-LPLFSGGA- 295  
*AtCUC2* VN-----SFSRLPPLGDFDPPFRFVSR-NVSTQSNFRSFQENFNQPPYFGSSA 324  
*CpaCUC2* ASSTFDGFPPLQPP-QPQMYAGYDSFTRFPRSVGLSGFPSLRSLQENLQ-LPFFSSST 318  
*MtCUC2* --NNFNNSNGSFDLVS PSMNATMDPFARFQRNVGVSAFP SLRSLQDNLQ-LPFFSSAA 333  
*PpCUC2* --S-----CFDL-AH-----AQPPPQPSFGGVSAFP SLRSLQENLQ-LPFFSPMS 299  
*VvCUC2* SFNAHH--QPPFDL-APPSIIGSIDPSRFPRNGAVPAFPNLRSIQENLH-LPFFSQVA 315  
*MdCUC2* --S-----CFDL-AH-----PPPQPPNFGGVSAFP SLRSLQENLQ-LPFFSPMP 294

.: \*::\*: \* \*

*CpCUC2B* LPSPPPLHGHNMSSSADVACNSAGNNG---VSD-----EPRSMNSTEL-DCM 359  
*CpCUC2A* LPSTTAVH--HG-NISSADIGACSSAGNWA---VSD-----ETRFMNSTEL-DCM 353  
*CpCUC1B* PPLVHLLT-----DAELVCGG---DGPAP-----DSRLVGSADMAAYM 294  
*CpCUC1A* PPLVHLLS-----GAADVDCG---GAPSPE-----DSRTIGSADLGAYM 319  
*CmaxCUC2* LPSPPPLHGHNIPSSTDVVACNSAGNWA---VSD-----EPRSMNSTEL-DCM 359  
*CmosCUC2* LPSPPPLHGHNMSSSADVAACNSAGNWA---VSD-----EPRSMNSTEL-DCM 360  
*CsCUC2* LCSPPVP---VL-NNGN-DVAGCSSGGNNG---VSD-----EPKVMNSTEL-DCM 356  
*CmCUC2* LCSPPVP---AL-NNGNNDVAACSSGGNNG---VAD-----EPKVMNSTEL-DCM 356  
*CaCUC2* -----SAMHGGFSNSIGNWSVPE-----TQKVEQSEL-DCM 325  
*AtCUC2* STMTSSVN-----LPSFQGGGVSGVNYWLPATAEE-----NESKVGVLHAGL-DCI 370  
*CpaCUC2* SSPSASIP-----PPLFQGGGGAFFSWPFM--PDE---GG---GKLCMGASEL-DCM 361  
*MtCUC2* AAQPPFPGGD-----ILGGWMPSEEQRVVVDSSGGGLNMGGGLGSSEL-DCM 378  
*PpCUC2* GHQPVHVGSSGGGGSTIDLGLSSAGSWPTPPHQE-----EPRTVGPTTEL-DCM 349  
*VvCUC2* PPIPSSGD-----PSTEMGITNSAGNWPAPENQKM---DN---GRLPMGATEL-DCM 360  
*MdCUC2* AHPPVHVGSVAGGGSSVDFT----GNWP---PVSE-----EARAVGPTTEL-DCM 336

: : : :

*CpCUC2B* WSY----- 362  
*CpCUC2A* WSY----- 356  
*CpCUC1B* WTF----- 297  
*CpCUC1A* WTF----- 322  
*CmaxCUC2* WSY----- 362  
*CmosCUC2* WSY----- 363  
*CsCUC2* WSY----- 359  
*CmCUC2* WSY----- 359  
*CaCUC2* WTY----- 328  
*AtCUC2* WNY----- 373  
*CpaCUC2* WSF----- 364  
*MtCUC2* WNY----- 381  
*PpCUC2* WTYKTECL 358  
*VvCUC2* WSY----- 363  
*MdCUC2* WNYKTECL 345

\*.:

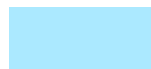

NAC domain

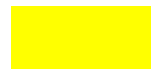

miR164 binding site

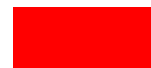

*cuc2b* mutation effect: S251F

**Supplementary Figure S2:** Multiple alignment of *CpCUC2* amino acid sequences with homologous *CUC2* proteins from diverse species. Blue boxes indicate the conserved NAC domain, yellow box the amino acid sequence of the miR164 binding site. The amino acid transition cause by the *cuc2b* mutation is highlighted in red.

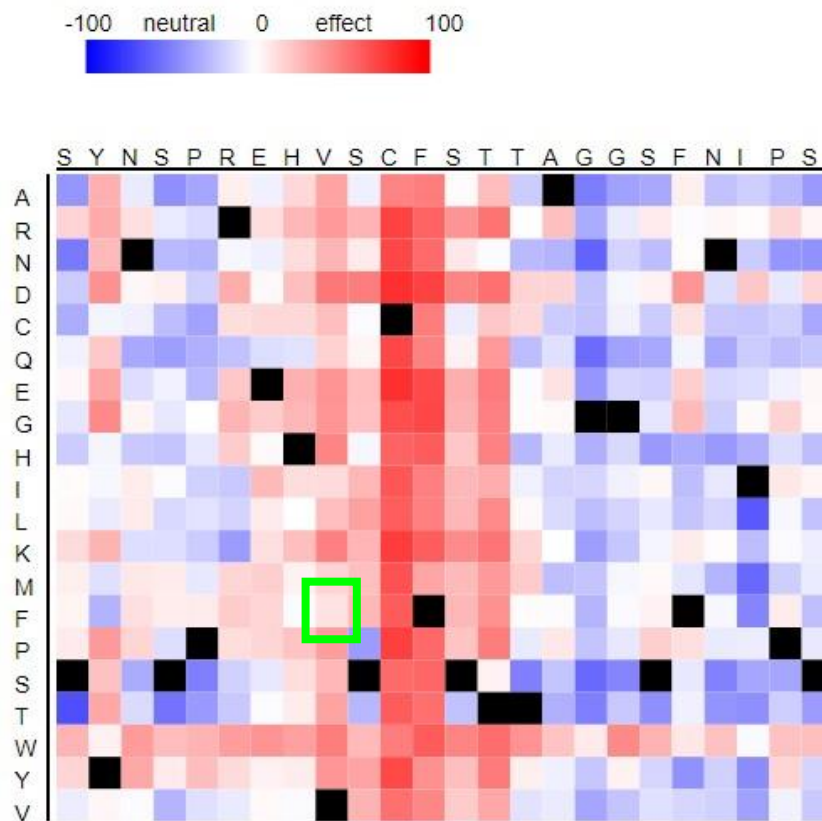

**Supplementary Figure S3:** Protein stability analysis of the S251F change in CUC2 protein. Heat map obtained by SNAP2 tool suggest a reduced effect of the mutation in the protein function.

| Consensus         | UGGAGAAGCAGGGCACGUGCA                           |    |
|-------------------|-------------------------------------------------|----|
| <i>CpmiR164</i>   | UGGAGAAGCAGGGCACGUGCA                           | 21 |
| <i>CmmiR164a</i>  | UGGAGAAGCAGGGCACGUGC <b>U</b>                   | 21 |
| <i>CmmiR164b</i>  | UGGAGA <b>G</b> GCAGGGCAC <b>A</b> UGC <b>U</b> | 21 |
| <i>CmmiR164c</i>  | UGGAGAAGCAGGGCACGUGCA                           | 21 |
| <i>CmmiR164d</i>  | UGGAGAAGCAGGGCACGUGCA                           | 21 |
| <i>AtmiR164a</i>  | UGGAGAAGCAGGGCACGUGCA                           | 21 |
| <i>AtmiR164b</i>  | UGGAGAAGCAGGGCACGUGCA                           | 21 |
| <i>AtmiR164c</i>  | UGGAGAAGCAGGGCACGUGC <b>G</b>                   | 21 |
| <i>CpamiR164a</i> | UGGAGAAGCAGGGCACGUGCA                           | 21 |
| <i>CpamiR164b</i> | UGGAGAAGCAGGGCACGUGCA                           | 21 |
| <i>CpamiR164c</i> | UGGAGAAGCAGGGCACGUGCA                           | 21 |
| <i>CpamiR164d</i> | UGGAGAAG <b>GGG</b> GCACGUGCA                   | 21 |
| <i>CpamiR164e</i> | UGGAGAAG <b>GGG</b> GCACGUGCA                   | 21 |
| <i>MtmiR164a</i>  | UGGAGAAGCAGGGCACGUGCA                           | 21 |
| <i>MtmiR164b</i>  | UGGAGAAGCAGGGCACGUGCA                           | 21 |
| <i>MtmiR164c</i>  | UGGAGAAGCAGGGCACGUGCA                           | 21 |
| <i>MtmiR164d</i>  | UGGAGAAGCAGGGCAC <b>A</b> UGC <b>U</b>          | 21 |
| <i>PpmiR164a</i>  | UGGAGAAGCAGGGCACGUGCA                           | 21 |
| <i>PpmiR164b</i>  | UGGAGAAGCAGGGCACGUGCA                           | 21 |
| <i>PpmiR164c</i>  | UGGAGAAGCAGGGCACGUGCA                           | 21 |
| <i>PpmiR164d</i>  | UGGAGAAGCAGGGCAC <b>A</b> UGC <b>U</b>          | 21 |
| <i>VvmiR164a</i>  | UGGAGAAGCAGGGCACGUGCA                           | 21 |
| <i>VvmiR164b</i>  | UGGAGAAGCAGGGCAC <b>A</b> UGC <b>U</b>          | 21 |
| <i>VvmiR164c</i>  | UGGAGAAGCAGGGCACGUGCA                           | 21 |
| <i>VvmiR164d</i>  | UGGAGAAGCAGGGCACGUGCA                           | 21 |
| <i>SlmiR164a</i>  | UGGAGAAGCAGGGCACGUGCA                           | 21 |
| <i>SlmiR164b</i>  | UGGAGAAGCAGGGCACGUGCA                           | 21 |

\*\*\*\*\* \* \* \*\*\*\* \*\*

**Supplementary Figure S4:** Multiple alignment of *CpmiR164* mature sequence with homologous *miR164* from diverse plant species.

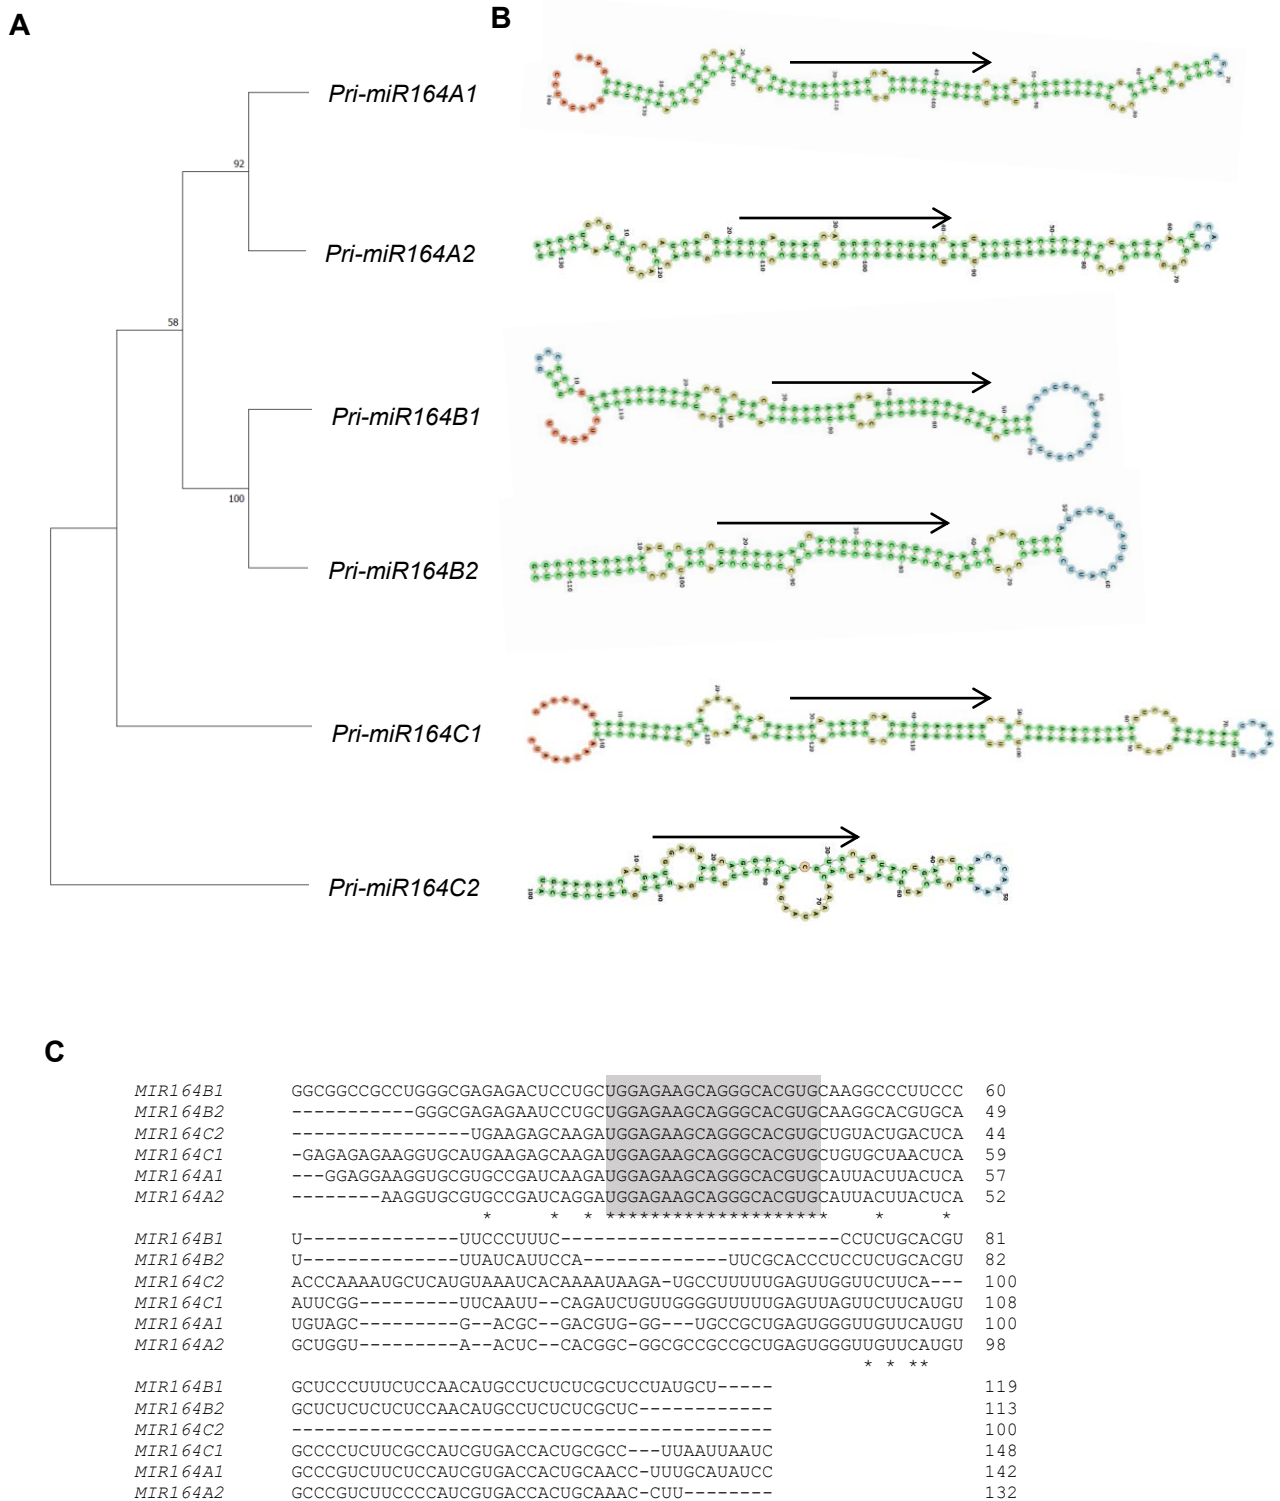

**Supplementary Figure S5:** Loci encoding *miR164* in *C. pepo*. (A) Phylogenetic tree and (B) secondary structure of six *pri-miRNA164* encoded by different genes in *C. pepo*. Black arrows indicate the position of *miR164* mature sequence. (C) Multiple alignment of the *MIR164* transcripts of *C. pepo*. Grey shadow shows the mature *miR164*.



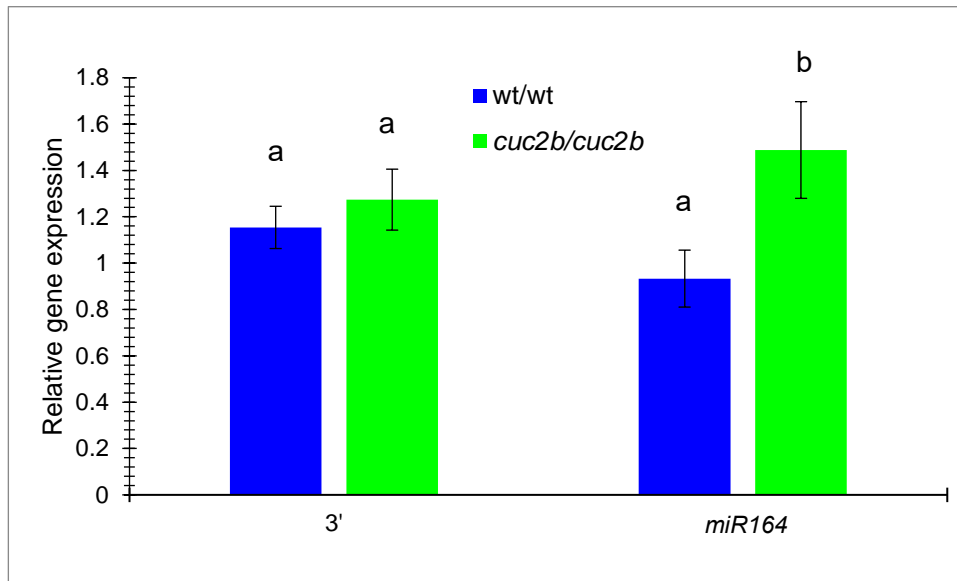

**Supplementary Figure S6:** qRT-PCR of *CpCUC2B* gene in the apical shoots of WT and *cuc2b* plants after female flowering. Left: Relative gene expression obtained with primers designed in the 3' region of the gene. Right: Relative gene expression obtained with primers designed in the flanking regions of *miR164* binding site. Different letters indicate significant differences between samples for each pair of primers (ANOVA,  $p \leq 0.05$ ); nd, no detectable expression.

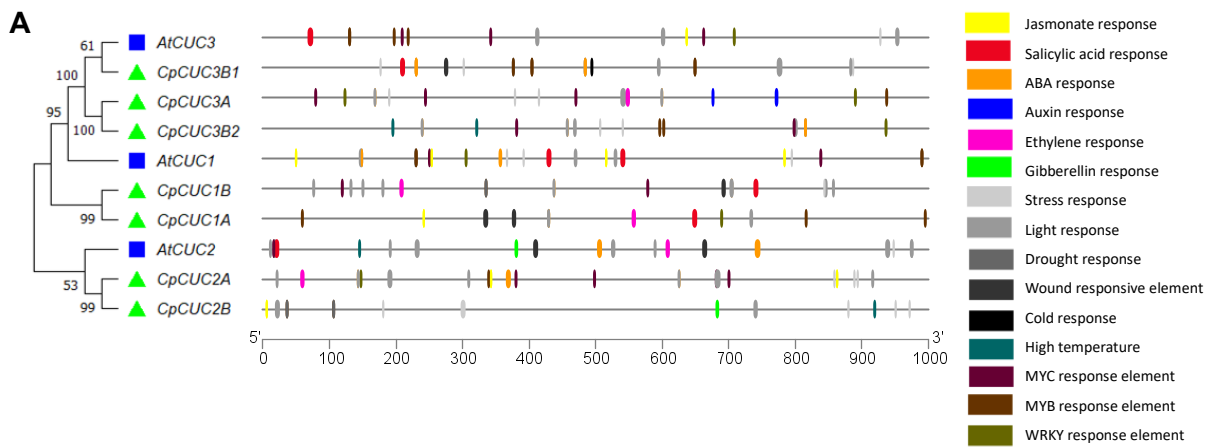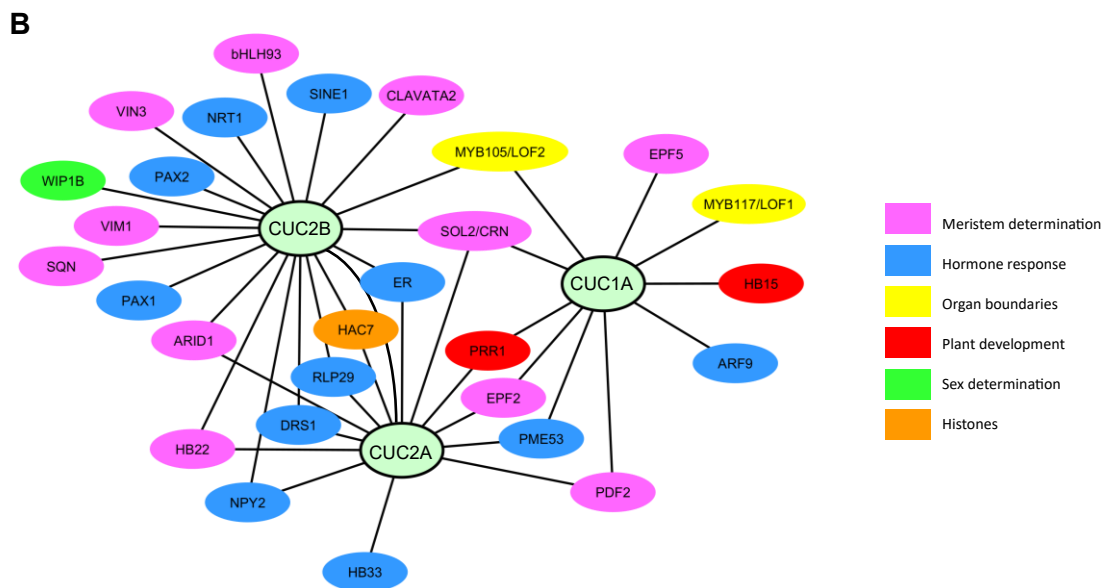

**Supplementary Figure S7. *CUC* genes regulation network. (A)** Cis-element analysis of *CUC* genes promoters. Elements related to hormones, stresses, and other transcription factors are shown. **(B)** Gene regulatory network of *CUC* transcription factors predicted by ARACNE algorithm.

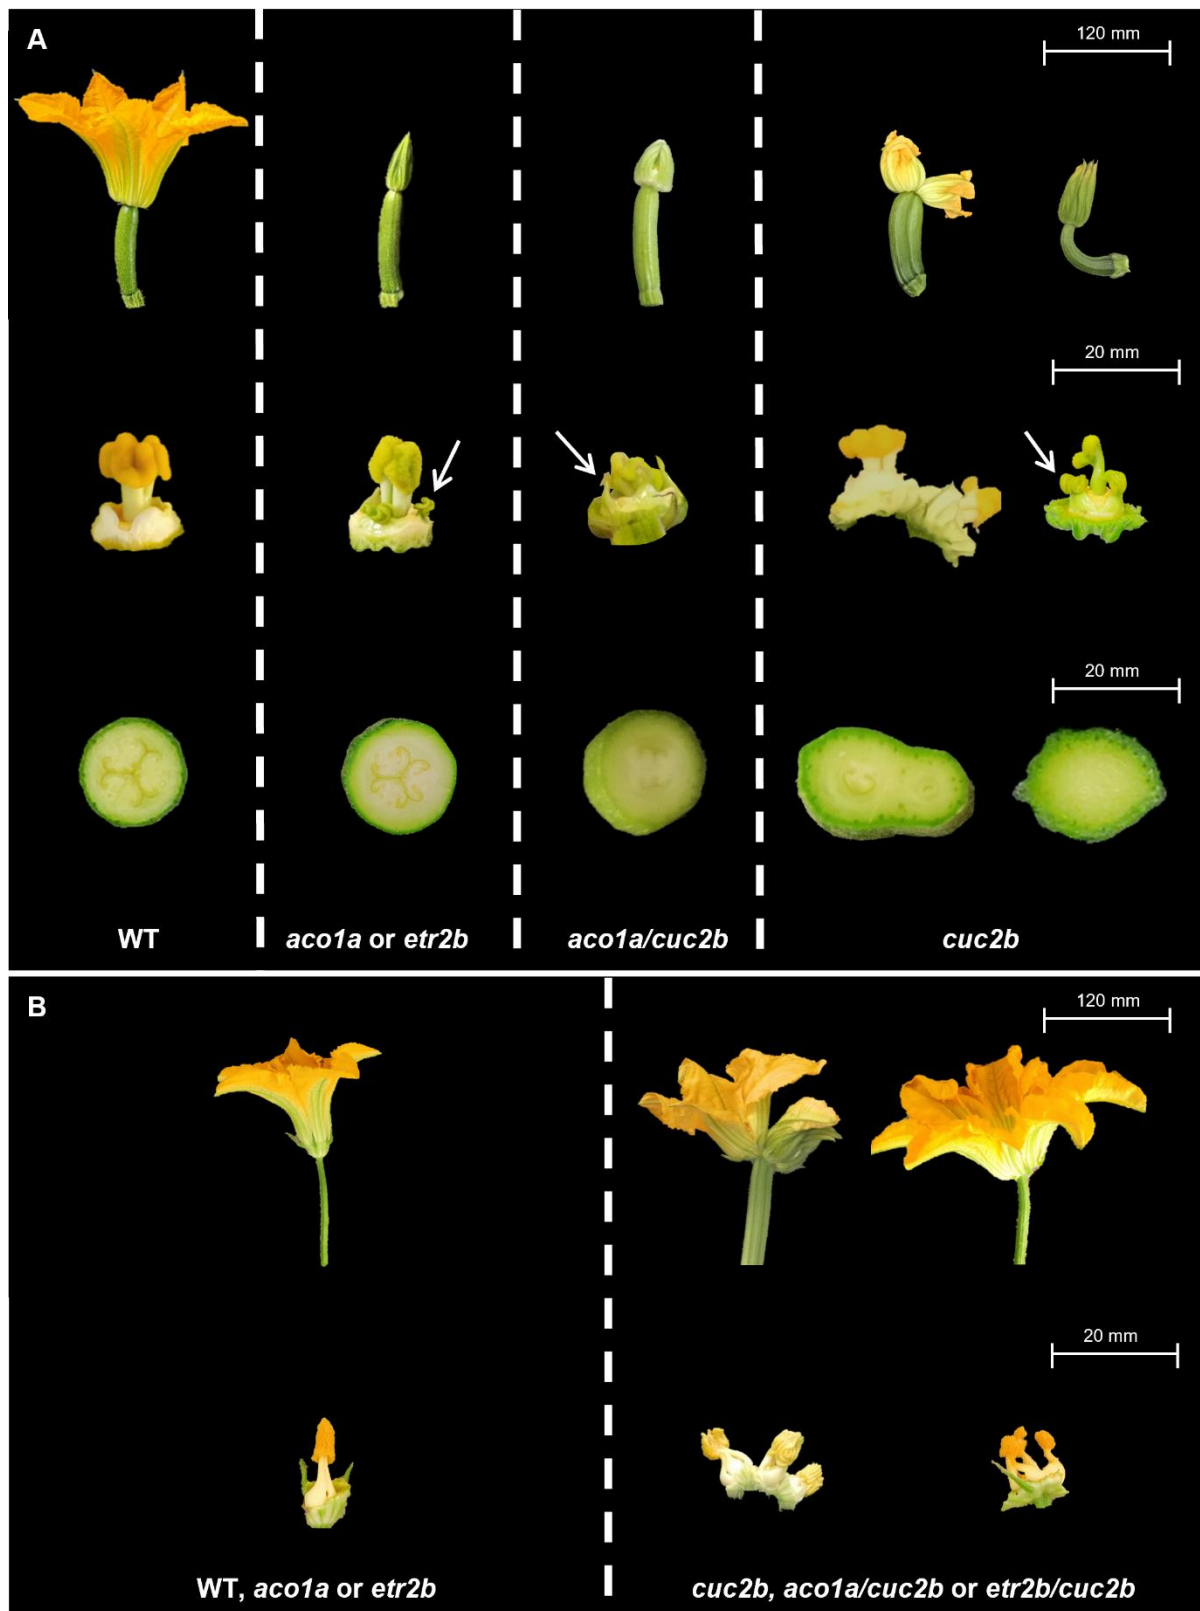

**Supplementary Figure S8.** Phenotypes of single and double mutants of *etr2b*, *aco1a* and *cuc2b*. **(A)** Pistillate flowers of each genotype. Up, complete pistillate flower; middle, detail of style and stigma of pistillate flowers; and down, transverse sections of ovaries. WT female flowers develop style and stigma, while bisexual *aco1a* and *etr2b* flowers develops both carpels and stamens. The double mutant *aco1a/cuc2b* produces bisexual flowers with stamens and defective carpels. Only 2.4% of the total flowers of *cuc2b* were bisexual, developing stamens and defective carpels, and an ovary with no endocarp and placental tissue. The double mutant *etr2b/cuc2b* only produces male flowers. White arrows indicate stamens of pistillate flowers. **(B)** Male flowers of the different genotypes. WT, *aco1a* and *etr2b* plants developed regular male flowers. The single *cuc2b* and the double *aco1a/cuc2b* and *etr2b/cuc2b* mutants develop single or double male flowers with increased number of floral organs.
